# Diagnostic model of saliva peptide finger print analysis of oral squamous cell carcinoma patients using weak cation exchange magnetic beads

Wei-Peng Jiang\*, Zhen Wang†, Li-Xin Xu\*, Xin Peng† and Feng Chen‡<sup>1</sup>

\*The Third Dental Center, Peking University School and Hospital of Stomatology, Beijing 100083, PR China

†Department of Oral and Maxillofacial Surgery, Peking University School and Hospital of Stomatology, Beijing 100081, PR China

‡Department of Central Laboratory, Peking University School and Hospital of Stomatology, Beijing 100081, PR China

## Synopsis

Saliva diagnostics utilizing nanotechnology and molecular technologies to detect oral squamous cell carcinoma (OSCC) has become an attractive field of study. However, no specific methods have been established. To refine the diagnostic power of saliva peptide fingerprints for the early detection of OSCC, we screened the expression spectrum of salivary peptides in 40 T1 stage OSCC patients (and healthy controls) using MALDI-TOF-MS combined with magnetic beads. Fifty proteins showed significantly different expression levels in the OSCC samples ( $P < 0.05$ ). Potential biomarkers were also predicted. The novel diagnostic proteomic model with  $m/z$  peaks of 1285.6 Da and 1432.2 Da are of certain value for early diagnosis of OSCC.

**Key words:** early diagnosis, histatin-3, matrix-assisted laser-desorption ionization–time-of-flight–mass spectrometry (MALDI-TOF-MS), oral squamous cell carcinoma (OSCC), peptides, saliva.

Cite this article as: Bioscience Reports (2015) 35, e00211, doi:10.1042/BSR20150023

## INTRODUCTION

Oral cancer, especially oral squamous cell carcinoma (OSCC), is a high-impact disease in the oral cavity. OSCC accounts for ~90 % of malignant oral lesions and is widely recognized as the most frequently occurring malignant tumour of oral structures. Each year, approximately 500000 new cases are diagnosed worldwide, with a 5-year survival rate of only 50 % [1]. In the early stages of OSCC, the tumour responds well to combination therapy, as evidenced by a 5-year survival of 80 % in these patients. However, the response to treatment is much lower in advanced OSCC [2]. Thus, there is a need to investigate the molecular mechanisms involved, to identify potential therapeutic targets as well as to discover biomarkers for the early detection of OSCC and subsequent monitoring of its progression.

Saliva has gained notable attention as a diagnostic fluid because it is easy to collect and process, minimally invasive and associated with low costs [3]. It contains a large array of proteins, which may be useful for novel approaches to prognosis,

clinical diagnosis and monitoring and management of disease. Comprehensive analysis of the human saliva proteome may contribute to the understanding of pathophysiologies and provide a foundation for the recognition of potential biomarkers of human disease [4–6].

MALDI-TOF-MS is a powerful technique that can be used to analyse proteins from saliva [7]. It can detect low-molecular-mass peptides with adequate resolution and sensitivity, making it a useful tool for peptide pattern profiling. In addition, beads with peptide libraries, mesoporous silica particles [8] or a magnetic core [9], such as weak cation-exchanger magnetic beads, may be utilized for selective enrichment of low-molecular-mass peptides before MS analysis. Magnetic beads constructed on nanomaterial are a promising material among the various types of separation beads. This kit based on weak cation exchange (WCX) principle. Proteins and peptides in samples are captured by specific adsorption of magnetic beads in low salt and low pH solution and released in high salt solution, so as to capture proteins and peptides in the serum. The proteins and peptides can be analysed by MALDI-TOF-MS. Using a combination of magnetic beads

**Abbreviations:** aPRP acidic proline-rich protein; bPRP basic proline-rich protein; gPRP glycosylated proline-rich protein; OSCC, oral squamous cell carcinoma; TLR, toll-like receptor; WCX, weak cation exchange; WS, whole saliva.

<sup>1</sup> To whom correspondence should be addressed (email [moleculerf@gmail.com](mailto:moleculerf@gmail.com)).

and MALDI-TOF MS enables efficient and sensitive detection of peptides that are specific for certain conditions; indeed, we used this technique to successfully identify serum peptide profiles in pilot studies [10,11]. This procedure, which involves weak cation-exchanging magnetic beads for sample separation, MALDI-TOF MS for peptide profile detection and a database for construction of condition-specific peptidome models, is a powerful tool that enables early detection, diagnosis and determination of the prognosis of various diseases [12].

In the present study, we investigated differences in the salivary peptide (1–10 kDa) profiles of T1 stage OSCC patients and healthy subjects by MALDI-TOF MS using a magnetic bead-based peptidome analysis of saliva samples. We aimed to identify a panel of specific biomarkers for differential expression.

## MATERIALS AND METHODS

### Ethics statement

The present study was approved by the Peking University Biomedical Ethics Committee. Adult subjects and parents of paediatric subjects signed an informed consent form before the start of research.

### Patients and saliva collection

All patients were enrolled in the Department of Oral and Maxillo-facial Surgery, Peking University School and Hospital of Stomatology between April 2013 and August 2014. Samples of unstimulated whole saliva (WS) were collected from 40 OSCC patients (19 males, 21 females; aged  $58.5 \pm 14.06$ ) and 23 healthy controls for comparative analysis. The 40 OSCC patients were diagnosed according to the results of oral pathology tests and had not taken any prescription medication to prevent changes in the flow rates of saliva. Patients with other medical disorders and complicated medication requirements were excluded from this study. Detailed clinical and serological characteristics of OSCC patients are showed in Table 1. A total of 23 WS samples were collected from healthy controls with a mean age of  $54.47 \pm 11.83$  years. Unstimulated WS samples were collected between 9 and 10 a.m. Patients were asked to refrain from eating, drinking, smoking and conducting oral hygiene procedures for at least 1 h before saliva collection. Before collection, the subject was instructed to rinse orally with water and then rest for 5 min with his/her eyes open and head tilted slightly forward. The WS was collected over a period of 15 min or more with a paper cup on ice and then centrifuged at 2600 g for 15 min at 4°C. Then the supernatant was removed and immediately stored at  $-80^{\circ}\text{C}$  in 200  $\mu\text{l}$  of aliquots for further analysis. Prior to proportional peptide mass fingerprint analysis, the deep-frozen samples were quickly thawed via brief immersion into hot water to maintain the integrity of proteins.

**Table 1** Demographics of patients (a) and healthy control subjects (b)

| Patient | Diagnosis | Location                  | Age (years) | Sex |
|---------|-----------|---------------------------|-------------|-----|
| (a)     |           |                           |             |     |
| 1       | OSCC      | Right buccal mucosa       | 64          | M   |
| 2       | OSCC      | Tongue                    | 58          | M   |
| 3       | OSCC      | Left lower gingiva        | 65          | F   |
| 4       | OSCC      | Left palate               | 81          | F   |
| 5       | OSCC      | Pharynx                   | 51          | M   |
| 6       | OSCC      | Left lower gingiva        | 63          | M   |
| 7       | OSCC      | Left lower gingiva        | 60          | M   |
| 8       | OSCC      | Supralabial               | 36          | F   |
| 9       | OSCC      | Left floor of mouth       | 61          | M   |
| 10      | OSCC      | Left upper gingiva        | 76          | F   |
| 11      | OSCC      | Right lower gingiva       | 59          | M   |
| 12      | OSCC      | Right mandible            | 65          | M   |
| 13      | OSCC      | Left tongue               | 41          | F   |
| 14      | OSCC      | Left mandible             | 62          | F   |
| 15      | OSCC      | Right lower gingiva       | 72          | F   |
| 16      | OSCC      | Tongue and floor of mouth | 53          | M   |
| 17      | OSCC      | Floor of mouth            | 46          | M   |
| 18      | OSCC      | Ventral tongue            | 51          | F   |
| 19      | OSCC      | Right floor of mouth      | 60          | M   |
| 20      | OSCC      | Left buccal mucosa        | 68          | F   |
| 21      | OSCC      | Left tongue               | 32          | M   |
| 22      | OSCC      | Left floor of mouth       | 65          | F   |
| 23      | OSCC      | Left floor of mouth       | 62          | M   |
| 24      | OSCC      | Supralabial               | 34          | F   |
| 25      | OSCC      | Right mandibular angle    | 48          | M   |
| 26      | OSCC      | Left lower gingiva        | 62          | F   |
| 27      | OSCC      | Right root of tongue      | 59          | F   |
| 28      | OSCC      | Right ventral tongue      | 40          | F   |
| 29      | OSCC      | Left soft palate          | 56          | F   |
| 30      | OSCC      | Left ventral tongue       | 64          | M   |
| 31      | OSCC      | Left tongue               | 70          | F   |
| 32      | OSCC      | Right buccal mucosa       | 41          | M   |
| 33      | OSCC      | Right palate              | 25          | F   |
| 34      | OSCC      | Right tongue              | 51          | F   |
| 35      | OSCC      | Left lower gingiva        | 76          | F   |
| 36      | OSCC      | Left buccal mucosa        | 67          | F   |
| 37      | OSCC      | Left tongue               | 21          | F   |
| 38      | OSCC      | Right lower gingiva       | 51          | F   |
| 39      | OSCC      | Right buccal mucosa       | 79          | M   |
| 40      | OSCC      | Palate                    | 55          | F   |
| (b)     |           |                           |             |     |
| Subject | Diagnosis | Age (years)               | Sex         |     |
| 1       | Normal    | 30                        | M           |     |
| 2       | Normal    | 31                        | F           |     |
| 3       | Normal    | 39                        | M           |     |
| 4       | Normal    | 39                        | M           |     |
| 5       | Normal    | 45                        | F           |     |

**Table 1 Continued**

| Subject | Diagnosis | Age (years) | Sex |
|---------|-----------|-------------|-----|
| 6       | Normal    | 50          | M   |
| 7       | Normal    | 50          | M   |
| 8       | Normal    | 50          | F   |
| 9       | Normal    | 53          | F   |
| 10      | Normal    | 53          | F   |
| 11      | Normal    | 56          | F   |
| 12      | Normal    | 56          | F   |
| 13      | Normal    | 56          | F   |
| 14      | Normal    | 60          | M   |
| 15      | Normal    | 60          | M   |
| 16      | Normal    | 60          | M   |
| 17      | Normal    | 63          | F   |
| 18      | Normal    | 67          | M   |
| 19      | Normal    | 67          | M   |
| 20      | Normal    | 67          | M   |
| 21      | Normal    | 67          | M   |
| 22      | Normal    | 67          | M   |
| 23      | Normal    | 73          | F   |

### Instruments and reagents

A weak cation exchange (WCX) magnetic bead kit (Bioyong SPE-C) and robotic separation device for a 96-well plate format magnetic separator were purchased from Bioyong (Bioyong technologies Inc). An LT-2 MALDI-TOF MS (Bioyong technologies Inc) was used for the MS analysis.

### Sample application and MALDI-TOF-MS analysis

The suspension in the WCX magnetic bead kit was mixed by shaking. After eluting and more shaking, the magnetic beads were separated from the protein and the eluted peptide samples were transferred to a clean 0.5 ml of tube for further MS analysis. Then, 5  $\mu$ l of hydroxy- $\alpha$ -cyano-cinnamic acid (HCCA) substrate solution (0.4 g/l, dissolved in acetone and ethanol) and 0.8–1.2  $\mu$ l of elution were mixed and 0.8–1.2  $\mu$ l of this mixture was applied to a metal target plate and dried at room temperature. Finally, the prepared sample was analysed by MALDI-TOF MS. Peptides with molecular masses of 1000–10000 Da were collected and 400 shots of laser energy were used. Peptide mass fingerprints were obtained by accumulating 50 single MS signal scans. The saliva samples collected from each patient were analysed serially three times using MALDI-TOF MS. The mean values of each sample were used for data analysis.

### Statistical analysis

The *t* test was used for comparisons between the OSCC and healthy subjects groups. Data were analysed using the Bio-Explorer statistical package (Bioyong Technology Inc). A *P*-value < 0.05 was considered statistically significant.

**Table 2 The list of peptide peak frequency greater than 50 % and the *P*-value less than 0.05**

| M/C ratio | <i>P</i> -value | Tendency |
|-----------|-----------------|----------|
| 1285.6    | 0.00000124      | ↑        |
| 1731      | 0.0000274       | ↓        |
| 1191.4    | 0.0000432       | ↓        |
| 1353.9    | 0.007           | ↓        |
| 1584.6    | 0.02            | ↓        |
| 1553.5    | 0.022           | ↑        |
| 1329.9    | 0.029           | ↑        |
| 1432.2    | 0.033           | ↑        |

## RESULTS

The general clinical characteristics of the subjects are presented in Table 1. The entire mass spectra of the extracted peptide samples from 63 subjects in the two groups were generated using the same instrument settings in the range of 1000–10000 Da (Supplementary Figure S1). Most peaks were detected in the range of 1000–3500 Da.

An average of 50 peptide mass peaks was found when the two groups were compared. Next, the peaks among the mass spectra were quantified and compared. Eight of these peptide mass peaks (1285.6, 1731, 1191.4, 1353.9, 1584.6, 1553.5, 1329.9 and 1432.2 Da) were significantly different between OSCC patients and healthy controls (Figures 1, 2 and Table 2). Among them, four peptides (at 1285.6, 1553.5, 1329.9 and 1432.2 Da) were up-regulated and four (at 1731, 1191.4, 1353.9 and 1584.6) were down-regulated in the OSCC patients (Figure 2).

All the eight mass peaks were used to establish the diagnostic model using the radial basis function method. Two peaks (1285.6 and 1432.2 Da) exhibited the most significant difference (*P* < 0.05, by *t* test) between the two groups compared with the other combinations of peptides. Thus, we used these two peptides to establish a fitted curve. 2D-cluster plot analysis demonstrated represents the best separating peaks in 2D spaces (Figure 3), whereas 3D view of principal component analysis (PCA) scores plot analysis indicated a well differential distribution of mass peaks between controls and OSCC patients (Figure 4). Columns represent samples; rows are *m/z* peaks as indicated by the average molecular mass. The shape of the two figures showed the well-separated locations of the samples from the two groups, indicating that the fitting results were satisfactory.

## DISCUSSION

Detection of oral cancer at an early stage is important for successful clinical therapy [13]. Patients with OSCC often present with advanced-stage disease, which is associated with poorer prognosis. Late-stage OSCC also requires more aggressive therapy,

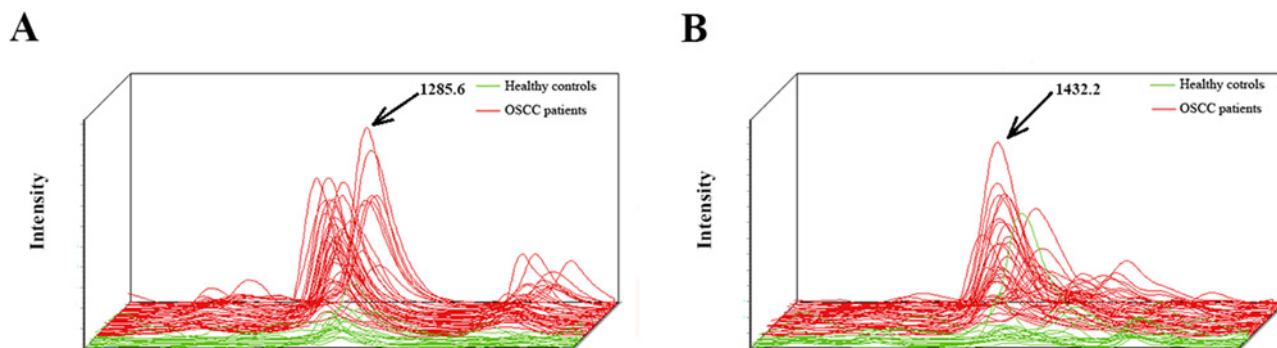

**Figure 1** 3D  $m/z$  ratio-intensity maps showing significantly different proteins

3D  $m/z$  ratio-intensity maps showed the two significantly different peptides at 1285.6, 1432.2 Da, which had a particular trend among the two groups. Green curve, healthy control group; red curve, 7-month group; blue curve, OSCC patients group.

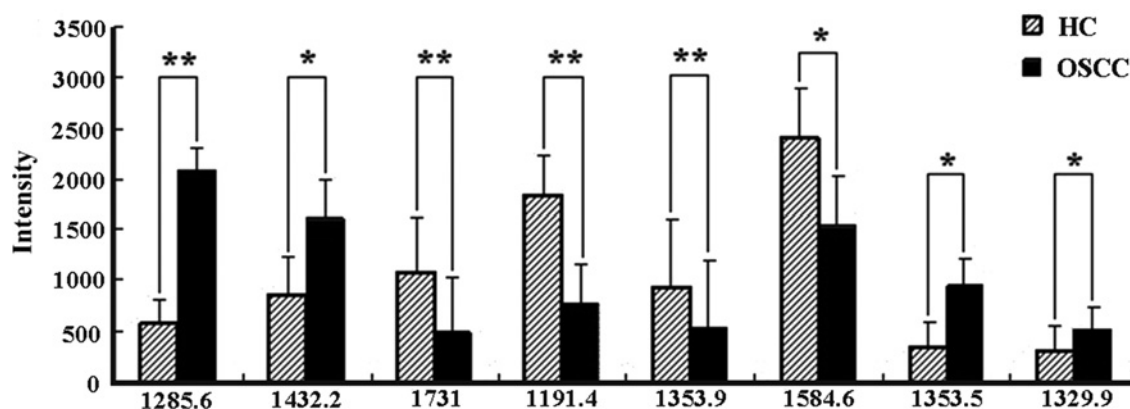

**Figure 2** Column views of the mass spectra of the two groups

The peak intensities of the two different groups showing an increasing trend in peak intensity at 1285.6, 1432.2, 1353.5 and 1329.9 Da and a decreasing trend at peak 1731, 1191.4, 1353.9, 1584.6 Da. (\* $P < 0.05$ ; \*\* $P < 0.01$ ).

which results in increased functional disability. Conventional diagnostic techniques, including direct inspection and imaging technology such as positron emission tomography-computed tomography, are limited in their ability to detect early stage OSCC and are ineffective for screening high-risk populations [9]. Screening tools are needed that combine high sensitivity and specificity and are sufficiently non-invasive and inexpensive to enable widespread use.

In recent years, interest in saliva for clinical purposes as an alternative to other body fluids, such as blood and urine, has increased. WS is a complex biological fluid due to the many processes involved in its production. In addition to the exocrine components, there are several non-exocrine contributors such as desquamated epithelial cells, intact and partial blood cells, gingival fluid and possibly fluid entering the oral cavity through mucosal seepage. This renders diagnosis of disease by the analysis of saliva both challenging and attractive. Saliva was found to be similar in microbial profile to the soft tissues [14]. This

was a significant finding from the study of the OSCC-free population [15]. So the screening test of salivary peptides for OSCC is appealing. MS-based proteomics is a high-throughput method used to analyse salivary proteomics and has been employed in the study of protein/peptide spectra, biological marker spectra, as well as single biological markers for complicated diseases such as cardiovascular and cerebrovascular diseases, OSCC and neuro-degenerative diseases.

To date, more than 2000 peptides have been discovered in the salivary peptidome [16–18]. By mapping the corresponding protein entries, it has been possible to assign those peptides to 695 non-redundant protein species [18]. Since the 1970s, salivary peptides have been grouped into six structurally-related major classes [19], namely, histatins, basic proline-rich proteins (bPRPs), acidic proline-rich proteins (aPRPs), glycosylated proline-rich proteins (gPRPs), statherin and cystatins [20–22]. Salivary PRPs, as well as bPRPs, aPRPs and gPRPs, are usually identified from the small peptide fraction (< 3 kDa). Some PRPs, along with statherin and

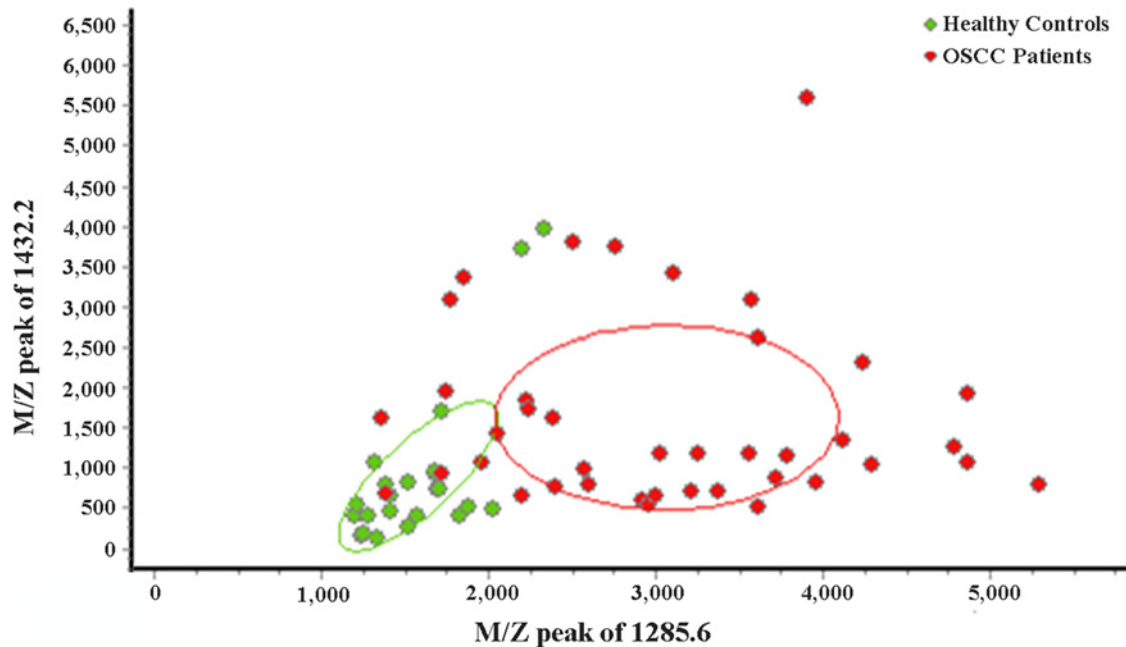

**Figure 3** Plots of the two groups generated by combining the 1285.6 and 1432.2 Da proteins

The scatter plots showed a well-fitting curve of two peaks with a significant difference ( $P < 0.01$ , by  $t$  test) in their distribution between healthy controls and OSCC patients.

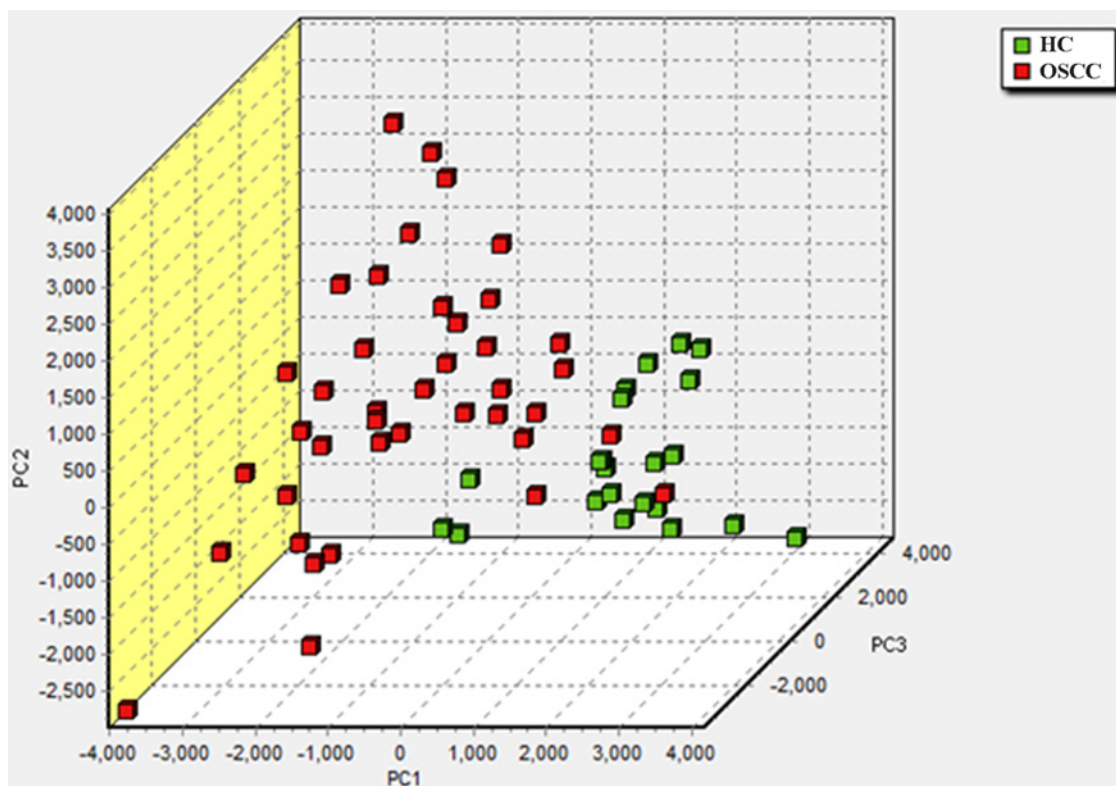

**Figure 4** 3D view created by PCA analysis

3D view displays of the principal component analysis of peptide profiles using BE software. Blue spots represent control individuals; red spots represent OSCC patients.



histatin-1, appear to actively participate in tooth mineralization. Histatins, especially histatin-3 and histatin-5, which are found in high amounts in saliva, are strongly anti-fungal [23]. The cystatin class comprises five major isoforms (S, C, D, SA and SN), which have strong bactericidal and virucidal properties [24]. Statherin, a multifunctional molecule that possesses a high affinity for calcium phosphate minerals, such as hydroxyapatite, contributes to the maintenance of the appropriate mineral solution. Defensins are a family of low-molecular-mass (3–4 kDa) cationic proteins with antibiotic, anti-fungal and anti-viral properties. They are involved not only in innate immunity against infections but also in adaptive immunity, inflammation and wound repair [25].

In the present study, WCX magnetic beads and the MALDI-MS technique were employed to investigate WS samples from OSCC patients and healthy controls. The components extracted by the WCX magnetic method could be either low-molecular-mass peptides or fragments resulting from proteolytic activity occurring in the WS after secretion into the oral cavity. WCX magnetic beads separate the proteins and/or peptides of different isoelectric points from complex biological fluids with specific anionic ligands. The techniques of MALDI-TOF-MS combined with WCX magnetic beads incorporate both of their advantages [26]; the low cost, the simple purification, could capture more proteomes than other methods especially in the low-molecular-mass range [27]; sensitive, fast and essential for clinical use [28] allowed the identification of comprehensive ‘fingerprints’ of protein profiles within biological fluids and were used to identify biomarkers of various diseases. The effectiveness of this combination of techniques has been confirmed in many saliva-based peptide profile identification studies [29,30]. We examined 40 T1-stage OSCC saliva samples and 23 healthy control samples. Eight  $m/z$  peaks were found to be significantly different between the groups. Four of these were up-regulated and four were down-regulated. The mass peaks of 1285.6 and 1432.2 were detectable in all OSCC samples at a high intensity, but seldom in the healthy subjects, suggesting that these represent markers of OSCC and may play a role in the occurrence and development of this disorder. The 1731 and 1353.9 mass peaks were detected in the majority of healthy subjects, but seldom in OSCC patients so it may be others biomarkers to detect OSCC.

Our results also differ from those of Jou et al. [9]. They found three significantly different peaks in OSCC patients and healthy controls. Two of these ( $m/z = 2919, 4373$ ) were up-regulated and one ( $m/z = 5592$ ) was down-regulated. The differences between the two studies may be attributable to the different age and sex of the participants involved and/or to the different methods used to extract low-molecular-mass peptides. The 95.7 % of participants enrolled in Jou et al.’s study were men (45 male, two female) with a mean  $\pm$  S.D. age of  $50.79 \pm 10.20$  years for the OSCC patients and 76.7 % were men (23 male, seven female) with  $44.9 \pm 10.1$  years for the healthy control subjects, whereas our study used 42.5 % men (17 male, 23 female) with a mean  $\pm$  S.D.

Age of  $56.25 \pm 14.23$  years in OSCC patients and 56.5 % men (13 male, 10 female) with  $54.74 \pm 11.83$  years in healthy controls. It is possible that the WS proteome changes with age [30]. The small peptides (<10 kDa) used for MS analysis in our

study were extracted from WS samples by WCX magnetic beads, whereas the saliva samples used in Jou et al.’s study were precipitated by using C8-magnetic beads. Nevertheless, the different processing methods could lead to artificial losses and modification of the samples, which could influence the results significantly [31].

The peptide sequence identifications made in the present study have led to interesting speculations. The mass peaks of 1285.6 and 1432.2 were both identified as histatin-3 by matching these peaks to the mass spectrum database of Bioyong Technologies Inc. histatin-3 belong to the histatin family which are a class of peptides named according to their high histidine content [21] that were identified in human saliva approximately 30 years ago [32,33]. Histatin family consist of 12 members found in the saliva secreted by the salivary glands of humans and higher primates, are localized in human oral tissues [34]. Histatin-3, which is 32 residues in length, is encoded for by the histatin-3 precursor (HIS2) gene [35]. Histatin-3 could kill *Candida albicans*, the most common and the most pathogenic oral *Candida* species [36,37]. However, histatin-3 are also active against other yeasts and fungi, including *Candida glabrata*, *Candida krusei*, *Saccharomyces cerevisiae* and *Cryptococcus neoformans* [38,39] and some bacterial species, including *Streptococcus mutans*, *Porphyromonas gingivalis* and *Actinobacillus actinomycetemcomitans* [40,41].

It has been reported that microorganisms, especially *Candida* species, are closely associated with OSCC [42–46]. Patients with OSCC tend to possess significantly raised concentrations of certain bacteria in their saliva [15,47,48]. Previous studies by various investigators have demonstrated a significant correlation between oral candidiasis and oral squamous carcinoma in a number of studies [49,50]. Rehani et al. [51] identified *Candida* as a possible factor in the development of OSCC. Marttila et al. [52] found that *Candida* colonization frequency and density were higher at oral mucosa of OSCC patients than in healthy controls’. Oral microorganisms inevitably up-regulate cytokines and other inflammatory mediators that affect the complex metabolic pathways and may thus be involved in carcinogenesis [46]. It has been suggested that *Candida* species play a role in oral carcinogenesis by triggering nitrosamine compounds to activate specified oncogenes, thereby initiating oral neoplasia [51,53,54]. Previous studies were also demonstrated that the secreted anti-microbial proteins responsible for combating oral candidiasis include the salivary histatins [55,56]. So it suggests that the high level of histatin-3 in OSCC patients’ saliva our findings were modulated by the raised concentrations of oral candidiasis.

In addition, histatin-3 are also involved in cell proliferation through the regulation of heat shock cognate protein 70 (HSC70) and cyclin-dependent kinase inhibitor 1B (p27Kip1) in oral cells [57] and could also bound to HSC70 inhibits HSC70-mediated activation of toll-like receptor (TLR) 4 signalling activation [58]. TLRs are a family of transmembrane proteins that recognize a variety of endogenous and microbial agents. The TLR 4 could lead to more aggressive, invasive behaviour of OSCCs [59]. It indicated that the histatin-3 may be involved in the progression of OSCC by interacting with TLR 4.

There is agreement that anti-microbial treatment is important pre-, during and post-therapy for oral cancer patients [46,60–62]. Histatin-3 possesses potent anti-fungal and anti-microbial properties and has the advantage over conventional synthetic azole or polyene anti-fungals and anti-microbial of being a naturally occurring compound in man, with no known cross-reactivity with human cells or tissues [63]. These qualities make it an ideal compound for development as an anti-fungal agent in the treatment of fungal infections of the oral cavity [64]. An important consideration in the development potential of histatin as a therapeutic agent would be the determination of the *in vivo* mechanism, occurrence and significance of resistance to this peptide.

In conclusion, our results suggested mass peaks of 1285.6 and 1432.2 Da which were both identified as histatin-3 in saliva as correlated with OSCC progression. However, the discovered candidate biomarkers need to be extensively validated with wider cases. Clearly, it is challenging to translate candidate biomarkers from proteomic investigations into real-world diagnostic or prognostic applications. Approval of use of histatin-3 as a biomarker to detect early stage of relies on the results of large-scale multicentre clinical trials. We plan to undertake such a study in the future.

#### AUTHOR CONTRIBUTION

Feng Chen conceived the study and revised the manuscript. Wei-Peng Jiang drafted the manuscript. Li-Xin Xu performed statistical analysis. Xin Peng revised the manuscript. Zhen Wang performed validation experiments. All authors read and approved the final manuscript.

#### ACKNOWLEDGEMENTS

The English in this document has been checked by at least two professional editors, both native speakers of English. For a certificate, please see: <http://www.textcheck.com/certificate/KausCz>.

#### FUNDING

This work was supported by the National Natural Science Foundation of China [grant numbers 81200762 and 81472527]; the National Supporting Program for Science and Technology [grant number 2014BAI04B06]; and the Science Foundation of the Third Dental Center, Peking University School and Hospital of Stomatology [grant number 011401].

## REFERENCES

- Parkin, D.M. (2001) Global cancer statistics in the year 2000. *Lancet Oncol.* **2**, 533–543 [CrossRef PubMed](#)
- Funk, G.F., Karnell, L.H., Robinson, R.A., Zhen, W.K., Trask, D.K. and Hoffman, H.T. (2002) Presentation, treatment, and outcome of oral cavity cancer: a National Cancer Data Base report. *Head Neck* **24**, 165–180 [CrossRef PubMed](#)
- Zhang, A., Sun, H., Wang, P., Han, Y. and Wang, X. (2012) Recent and potential developments of biofluid analyses in metabolomics. *J. Proteomics* **75**, 1079–1088 [CrossRef PubMed](#)
- Besson, D., Pavageau, A.H., Valo, I., Bourreau, A., Belanger, A., Eymerit-Morin, C., Mouliere, A., Chassevent, A., Boisdron-Celle, M., Morel, A. et al. (2011) A quantitative proteomic approach of the different stages of colorectal cancer establishes OLFM4 as a new nonmetastatic tumor marker. *Mol. Cell. Proteomics* **10**, M111 009712 [CrossRef PubMed](#)
- Shelburne, S. A., 3rd, Sumbly, P., Sitkiewicz, I., Granville, C., DeLeo, F.R. and Musser, J.M. (2005) Central role of a bacterial two-component gene regulatory system of previously unknown function in pathogen persistence in human saliva. *Proc. Natl. Acad. Sci. U.S.A.* **102**, 16037–16042 [CrossRef PubMed](#)
- Lee, K., Rho, B.S., Pi, K., Kim, H.J. and Choi, Y.J. (2011) Proteomic analysis of protein expression in *Lactobacillus plantarum* in response to alkaline stress. *J. Biotechnol.* **153**, 1–7 [CrossRef PubMed](#)
- Giacomelli, C., Bazzichi, L., Giusti, L., Ciregia, F., Baldini, C., Da Valle, Y., De Feo, F., Sernissi, F., Rossi, A., Bombardieri, S. and Lucacchini, A. (2011) [MALDI-TOF and SELDI-TOF analysis: “tandem” techniques to identify potential biomarker in fibromyalgia]. *Reumatismo* **63**, 165–170 [CrossRef PubMed](#)
- Terracciano, R., Preiano, M., Palladino, G.P., Carpagnano, G.E., Barbaro, M.P., Pelaia, G., Savino, R. and Maselli, R. (2011) Peptidome profiling of induced sputum by mesoporous silica beads and MALDI-TOF MS for non-invasive biomarker discovery of chronic inflammatory lung diseases. *Proteomics* **11**, 3402–3414 [CrossRef PubMed](#)
- Jou, Y.J., Lin, C.D., Lai, C.H., Tang, C.H., Huang, S.H., Tsai, M.H., Chen, S.Y., Kao, J.Y. and Lin, C.W. (2011) Salivary zinc finger protein 510 peptide as a novel biomarker for detection of oral squamous cell carcinoma in early stages. *Clin. Chim. Acta* **412**, 1357–1365 [CrossRef PubMed](#)
- Zhang, J., Zhou, S., Li, R., Cao, T., Zheng, H., Wang, X., Zhou, Y., Du, N., Chen, F. and Lin, J. (2012) Magnetic bead-based salivary peptidome profiling for periodontal-orthodontic treatment. *Proteome. Sci.* **10**, 63 [CrossRef PubMed](#)
- Zhang, J., Zhou, S., Zheng, H., Zhou, Y., Chen, F. and Lin, J. (2012) Magnetic bead-based salivary peptidome profiling analysis during orthodontic treatment durations. *Biochem. Biophys. Res. Commun.* **421**, 844–849 [CrossRef PubMed](#)
- Wu, Z.Z., Wang, J.G. and Zhang, X.L. (2009) Diagnostic model of saliva protein fingerprint analysis of patients with gastric cancer. *World J. Gastroenterol.* **15**, 865–870 [CrossRef PubMed](#)
- Sanjay, P.R., Hallikeri, K. and Shivashankara, A.R. (2008) Evaluation of salivary sialic acid, total protein, and total sugar in oral cancer: a preliminary report. *Indian J. Dent. Res.* **19**, 288–291 [CrossRef PubMed](#)
- Liljemark, W.F. and Gibbons, R.J. (1972) Proportional distribution and relative adherence of *Streptococcus mitis* (mitis) on various surfaces in the human oral cavity. *Infect. Immun.* **6**, 852–859 [PubMed](#)
- Mager, D.L., Haffajee, A.D., Devlin, P.M., Norris, C.M., Posner, M.R. and Goodson, J.M. (2005) The salivary microbiota as a diagnostic indicator of oral cancer: a descriptive, non-randomized study of cancer-free and oral squamous cell carcinoma subjects. *J. Transl. Med.* **3**, 27 [CrossRef PubMed](#)
- Hu, S., Loo, J.A. and Wong, D.T. (2006) Human body fluid proteome analysis. *Proteomics* **6**, 6326–6353 [CrossRef PubMed](#)
- Helmerhorst, E.J., Sun, X., Salih, E. and Oppenheim, F.G. (2008) Identification of Lys-Pro-Gln as a novel cleavage site specificity of saliva-associated proteases. *J. Biol. Chem.* **283**, 19957–19966 [CrossRef PubMed](#)
- Vitorino, R., Barros, A., Caseiro, A., Domingues, P., Duarte, J. and Amado, F. (2009) Towards defining the whole salivary peptidome. *Proteomics Clin.* **5**, 13

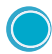

- 19 Helmerhorst, E.J. and Oppenheim, F.G. (2007) Saliva: a dynamic proteome. *J. Dent. Res.* **86**, 680–693 [CrossRef PubMed](#)
- 20 Schlesinger, D.H., Hay, D.I. and Levine, M.J. (1989) Complete primary structure of statherin, a potent inhibitor of calcium phosphate precipitation, from the saliva of the monkey, *Macaca arctoides*. *Int. J. Pept. Protein. Res.* **34**, 374–380 [CrossRef PubMed](#)
- 21 Oppenheim, F.G., Xu, T., McMillian, F.M., Levitz, S.M., Diamond, R.D., Offner, G.D. and Troxler, R.F. (1988) Histatins, a novel family of histidine-rich proteins in human parotid secretion. Isolation, characterization, primary structure, and fungistatic effects on *Candida albicans*. *J. Biol. Chem.* **263**, 7472–7477 [PubMed](#)
- 22 Hay, D.I., Bennick, A., Schlesinger, D.H., Minaguchi, K., Madapallimattam, G. and Schluckebier, S.K. (1988) The primary structures of six human salivary acidic proline-rich proteins (PRP-1, PRP-2, PRP-3, PRP-4, PIF-s and PIF-f). *Biochem. J.* **255**, 15–21 [PubMed](#)
- 23 Edgerton, M. and Koshlukova, S.E. (2000) Salivary histatin 5 and its similarities to the other antimicrobial proteins in human saliva. *Adv. Dent. Res.* **14**, 16–21 [CrossRef PubMed](#)
- 24 Amado, F.M., Vitorino, R.M., Domingues, P.M., Lobo, M.J. and Duarte, J.A. (2005) Analysis of the human saliva proteome. *Expert Rev. Proteomics* **2**, 521–539 [CrossRef PubMed](#)
- 25 Chen, H., Xu, Z., Peng, L., Fang, X., Yin, X., Xu, N. and Cen, P. (2006) Recent advances in the research and development of human defensins. *Peptides* **27**, 931–940 [CrossRef PubMed](#)
- 26 Sun, L., Chen, H., Hu, C., Wang, P., Li, Y., Xie, J., Tang, F., Ba, D., Zhang, X. and He, W. (2011) Identify biomarkers of neuropsychiatric systemic lupus erythematosus by matrix-assisted laser desorption/ionization time-of-flight mass spectrometry combined with weak cation magnetic beads. *J. Rheumatol.* **38**, 454–461 [CrossRef PubMed](#)
- 27 Li, Y.H., Wang, J., Zheng, X.L., Zhang, Y.L., Li, X., Yu, S., He, X. and Chan, P. (2011) Matrix-assisted laser desorption/ionization time-of-flight mass spectrometry combined with magnetic beads for detecting serum protein biomarkers in parkinson's disease. *Eur. Neurol.* **65**, 105–111 [CrossRef PubMed](#)
- 28 Guo, N., Wen, Q., Li, Z.J., Xu, R.C., Peng, F.F. and Yu, X.Q. (2014) Optimization and evaluation of magnetic bead separation combined with matrix-assisted laser desorption/ionization time-of-flight mass spectroscopy (MALDI-TOF MS) for proteins profiling of peritoneal dialysis effluent. *Int. J. Mol. Sci.* **15**, 1162–1175 [CrossRef PubMed](#)
- 29 Schwaborn, K., Krieg, R.C., Grosse, J., Reulen, N., Weiskirchen, R., Knuechel, R., Jakse, G. and Henkel, C. (2009) Serum proteomic profiling in patients with bladder cancer. *Eur. Urol.* **56**, 989–996 [CrossRef PubMed](#)
- 30 Fleissig, Y., Reichenberg, E., Redlich, M., Zaks, B., Deutsch, O., Aframian, D.J. and Palmon, A. (2010) Comparative proteomic analysis of human oral fluids according to gender and age. *Oral Dis.* **16**, 831–838 [CrossRef PubMed](#)
- 31 Amado, F., Lobo, M.J., Domingues, P., Duarte, J.A. and Vitorino, R. (2010) Salivary peptidomics. *Expert Rev. Proteomics* **7**, 709–721 [CrossRef PubMed](#)
- 32 Bonilla, C.A. (1969) Rapid isolation of basic proteins and polypeptides from salivary gland secretions by adsorption chromatography on polyacrylamide gel. *Anal. Biochem.* **32**, 522–529 [CrossRef PubMed](#)
- 33 Azen, E.A. (1972) Genetic polymorphism of basic proteins from parotid saliva. *Science* **176**, 673–674 [CrossRef PubMed](#)
- 34 Fitzgerald, D.H., Coleman, D.C. and O'Connell, B.C. (2003) Susceptibility of *Candida dubliniensis* to salivary histatin 3. *Antimicrob. Agents Chemother.* **47**, 70–76 [CrossRef](#)
- 35 Sabatini, L.M. and Azen, E.A. (1989) Histatins, a family of salivary histidine-rich proteins, are encoded by at least two loci (HIS1 and HIS2). *Biochem. Biophys. Res. Commun.* **160**, 495–502 [CrossRef PubMed](#)
- 36 Calderone, R.A. and Fonzi, W.A. (2001) Virulence factors of *Candida albicans*. *Trends Microbiol.* **9**, 327–335 [CrossRef PubMed](#)
- 37 Xu, Y., Ambudkar, I., Yamagishi, H., Swaim, W., Walsh, T.J. and O'Connell, B.C. (1999) Histatin 3-mediated killing of *Candida albicans*: effect of extracellular salt concentration on binding and internalization. *Antimicrob. Agents Chemother.* **43**, 2256–2262 [PubMed](#)
- 38 Pollock, J.J., Denepitiya, L., MacKay, B.J. and Iacono, V.J. (1984) Fungistatic and fungicidal activity of human parotid salivary histidine-rich polypeptides on *Candida albicans*. *Infect. Immun.* **44**, 702–707 [PubMed](#)
- 39 Rayhan, R., Xu, L., Santarpia, R. P., III, Tylanda, C.A. and Pollock, J.J. (1992) Antifungal activities of salivary histidine-rich polypeptides against *Candida albicans* and other oral yeast isolates. *Oral Microbiol. Immunol.* **7**, 51–52 [CrossRef PubMed](#)
- 40 MacKay, B.J., Denepitiya, L., Iacono, V.J., Krost, S.B. and Pollock, J.J. (1984) Growth-inhibitory and bactericidal effects of human parotid salivary histidine-rich polypeptides on *Streptococcus mutans*. *Infect Immun.* **44**, 695–701 [PubMed](#)
- 41 Murakami, Y., Nagata, H., Amano, A., Takagaki, M., Shizukuishi, S., Tsunemitsu, A. and Aimoto, S. (1991) Inhibitory effects of human salivary histatins and lysozyme on coaggregation between *Porphyromonas gingivalis* and *Streptococcus mitis*. *Infect Immun.* **59**, 3284–3286 [PubMed](#)
- 42 Nagy, K.N., Sonkodi, I., Szoke, I., Nagy, E. and Newman, H.N. (1998) The microflora associated with human oral carcinomas. *Oral. Oncol.* **34**, 304–308 [CrossRef PubMed](#)
- 43 Johnson, N.W., Jayasekara, P. and Amarasinghe, A.A. (2011) Squamous cell carcinoma and precursor lesions of the oral cavity: epidemiology and aetiology. *Periodontol.* **57**, 19–37 [CrossRef PubMed](#)
- 44 Tanaka, T., Tanaka, M. and Tanaka, T. (2011) Oral carcinogenesis and oral cancer chemoprevention: a review. *Patholog. Res.* **2011**, 431246
- 45 Mantovani, A., Garlanda, C. and Allavena, P. (2010) Molecular pathways and targets in cancer-related inflammation. *Ann. Med.* **42**, 161–170 [CrossRef PubMed](#)
- 46 Meurman, J.H. (2010) Oral microbiota and cancer. *J. Oral. Microbiol.* **2**, doi: 10.3402/jom.v2i0.5195 [CrossRef](#)
- 47 Hooper, S.J., Crean, S.J., Fardy, M.J., Lewis, M.A., Spratt, D.A., Wade, W.G. and Wilson, M.J. (2007) A molecular analysis of the bacteria present within oral squamous cell carcinoma. *J. Med. Microbiol.* **56**, 1651–1659 [CrossRef PubMed](#)
- 48 Pushalkar, S., Mane, S.P., Ji, X., Li, Y., Evans, C., Crasta, O.R., Morse, D., Meagher, R., Singh, A. and Saxena, D. (2011) Microbial diversity in saliva of oral squamous cell carcinoma. *FEMS Immunol. Med. Microbiol.* **61**, 269–277 [CrossRef PubMed](#)
- 49 Uittamo, J., Siikala, E., Kaihovaara, P., Salaspuro, M. and Rautemaa, R. (2009) Chronic candidosis and oral cancer in APECED-patients: production of carcinogenic acetaldehyde from glucose and ethanol by *Candida albicans*. *Int. J. Cancer.* **124**, 754–756 [CrossRef PubMed](#)
- 50 Rosa, D.D., Pasqualotto, A.C. and Denning, D.W. (2008) Chronic mucocutaneous candidiasis and oesophageal cancer. *Med. Mycol.* **46**, 85–91 [CrossRef PubMed](#)
- 51 Rehani, S., Rao, N.N., Rao, A., Carnelio, S., Ramakrishnaiah, S.H. and Prakash, P.Y. (2011) Spectrophotometric analysis of the expression of secreted aspartyl proteinases from *Candida* in leukoplakia and oral squamous cell carcinoma. *J. Oral. Sci.* **53**, 421–425 [CrossRef PubMed](#)
- 52 Marttila, E., Uittamo, J., Rusanen, P., Lindqvist, C., Salaspuro, M. and Rautemaa, R. (2013) Acetaldehyde production and microbial colonization in oral squamous cell carcinoma and oral lichenoid disease. *Oral Surg. Oral Med. Oral Pathol. Oral Radiol.* **116**, 61–68 [CrossRef PubMed](#)
- 53 Field, E.A., Field, J.K. and Martin, M.V. (1989) Does *Candida* have a role in oral epithelial neoplasia? *J. Med. Vet. Mycol.* **27**, 277–294 [CrossRef](#)



- 54 Sanjaya, P.R., Gokul, S., Gururaj Patil, B. and Raju, R. (2011) Candida in oral pre-cancer and oral cancer. *Med. Hypotheses* **77**, 1125–1128 [CrossRef PubMed](#)
- 55 Bercier, J.G., Al-Hashimi, I., Haghighat, N., Rees, T.D. and Oppenheim, F.G. (1999) Salivary histatins in patients with recurrent oral candidiasis. *J. Oral Pathol. Med.* **28**, 26–29 [CrossRef PubMed](#)
- 56 Fitzgerald-Hughes, D.H., Coleman, D.C. and O'Connell, B.C. (2007) Differentially expressed proteins in derivatives of *Candida albicans* displaying a stable histatin 3-resistant phenotype. *Antimicrob. Agents Chemother* **51**, 2793–2800 [CrossRef PubMed](#)
- 57 Imamura, Y., Fujigaki, Y., Oomori, Y., Usui, S. and Wang, P.L. (2009) Cooperation of salivary protein histatin 3 with heat shock cognate protein 70 relative to the G1/S transition in human gingival fibroblasts. *J. Biol. Chem.* **284**, 14316–14325 [CrossRef PubMed](#)
- 58 Imamura, Y. and Wang, P.L. (2014) Salivary histatin 3 inhibits heat shock cognate protein 70-mediated inflammatory cytokine production through toll-like receptors in human gingival fibroblasts. *J. Inflamm.* **11**, 4 [CrossRef](#)
- 59 Ahmed Haji Omar, A., Korvala, J., Haglund, C., Virolainen, S., Hayry, V., Atula, T., Kontio, R., Rihthiemi, J., Pihakari, A., Sorsa, T. et al. (2015) Toll-like receptors -4 and -5 in oral and cutaneous squamous cell carcinomas. *J. Oral Pathol. Med.* **44**, 258–265 [CrossRef PubMed](#)
- 60 Nagy, K., Szoke, I., Sonkodi, I., Nagy, E., Mari, A., Szolnoky, G. and Newman, H.N. (2000) Inhibition of microflora associated with oral malignancy. *Aust. Dent. J.* **36**, 32–36
- 61 Chandu, A., Stulner, C., Bridgeman, A.M. and Smith, A.C. (2002) Maintenance of mouth hygiene in patients with oral cancer in the immediate post-operative period. *Curr. Pharm. Des.* **47**, 170–173
- 62 Meyer, J.E. and Harder, J. (2007) Antimicrobial peptides in oral cancer. *J. Pharm. Pharmacol.* **13**, 3119–3130
- 63 Kavanagh, K. and Dowd, S. (2004) Histatins: antimicrobial peptides with therapeutic potential. *Expert Opin. Investig. Drugs* **56**, 285–289
- 64 Lupetti, A., Danesi, R., van 't Wout, J.W., van Dissel, J.T., Senesi, S. and Nibbering, P.H. (2002) Antimicrobial peptides: therapeutic potential for the treatment of *Candida* infections. *Expert. Opin. Inv. Drug.* **11**, 309–318 [CrossRef](#)

---

**Received 28 January 2015/6 May 2015; accepted 8 May 2015**

---

**Published as Immediate Publication 12 May 2015, doi 10.1042/BSR20150023**

---
